# Supplementary material for: Metabolomics Studies in Psoriatic Disease: A Review
Source: MDPI journal article supplement (doi:10.3390/metabo11060375), 2021-06-10
Supplement: s1 [file s1]

# S1: Search documentation for review

Searches run January 26, 2021

- OVID Medline ALL
- OVID Embase Classic + Embase
- OVID Cochrane Central Register of Controlled Trials
- Web of Science BIOSIS Citation Index

Strategies from January 26, 2021

Database(s): **Ovid MEDLINE(R) ALL** 1946 to January 25, 2021

Search Strategy:

| #  | Searches                                                      | Results |
|----|---------------------------------------------------------------|---------|
| 1  | exp Psoriasis/ [includes Arthritis, Psoriatic/]               | 40936   |
| 2  | psorias*.mp.                                                  | 50905   |
| 3  | psoriat*.mp.                                                  | 19603   |
| 4  | (pustul* adj4 palm*).mp.                                      | 1083    |
| 5  | (pustul* adj4 plantar*).mp.                                   | 303     |
| 6  | (arthrit* adj4 mutilans).mp.                                  | 163     |
| 7  | (pustul* adj4 soles).mp.                                      | 28      |
| 8  | 1 or 2 or 3 or 4 or 5 or 6 or 7                               | 57463   |
| 9  | exp Metabolomics/                                             | 17971   |
| 10 | metabolom*.mp.                                                | 41919   |
| 11 | metabolit*.mp.                                                | 286493  |
| 12 | (metabol* adj4 produc*).mp.                                   | 46883   |
| 13 | (metabol* adj4 waste*).mp.                                    | 1176    |
| 14 | exp Lipids/ and (produc* or waste* or metaboliz*).mp.         | 243514  |
| 15 | lipidom*.mp.                                                  | 6393    |
| 16 | ((lipid or lipids) and (produc* or waste* or metaboliz*)).mp. | 117010  |
| 17 | (fatty acid* and (produc* or waste* or metaboliz*)).mp.       | 73084   |
| 18 | (fatty acyl* and (produc* or waste* or metaboliz*)).mp.       | 1743    |
| 19 | or/9-18                                                       | 625384  |
| 20 | 8 and 19                                                      | 1188    |
| 21 | exp animals/ not (exp animals/ and exp humans/)               | 4780109 |
| 22 | 20 not 21                                                     | 1097    |

Database(s): **Embase Classic+Embase** 1947 to 2021 January 25

Search Strategy:

| #  | Searches                                                                                                                                   | Results |
|----|--------------------------------------------------------------------------------------------------------------------------------------------|---------|
| 1  | exp psoriasis/ [includes psoriatic arthritis]                                                                                              | 98341   |
| 2  | psorias*.mp.                                                                                                                               | 92060   |
| 3  | psoriat*.mp.                                                                                                                               | 40006   |
| 4  | (pustul* adj4 palm*).mp.                                                                                                                   | 2611    |
| 5  | (pustul* adj4 plantar*).mp.                                                                                                                | 435     |
| 6  | (arthrit* adj4 mutilans).mp.                                                                                                               | 278     |
| 7  | (pustul* adj4 soles).mp.                                                                                                                   | 53      |
| 8  | 1 or 2 or 3 or 4 or 5 or 6 or 7                                                                                                            | 107911  |
| 9  | exp lipidomics/ or exp metabolomics/                                                                                                       | 41255   |
| 10 | metabolom*.mp.                                                                                                                             | 52683   |
| 11 | metabolit*.mp.                                                                                                                             | 553048  |
| 12 | (metabol* adj4 produc*).mp.                                                                                                                | 58482   |
| 13 | (metabol* adj4 waste*).mp.                                                                                                                 | 1494    |
| 14 | exp lipid/ and (produc* or waste* or metaboliz*).mp.                                                                                       | 346994  |
| 15 | lipidom*.mp.                                                                                                                               | 9526    |
| 16 | ((lipid or lipids) and (produc* or waste* or metaboliz*)).mp.                                                                              | 170118  |
| 17 | (fatty acid* and (produc* or waste* or metaboliz*)).mp.                                                                                    | 97017   |
| 18 | (fatty acyl* and (produc* or waste* or metaboliz*)).mp.                                                                                    | 1876    |
| 19 | or/9-18                                                                                                                                    | 982610  |
| 20 | 8 and 19                                                                                                                                   | 2731    |
| 21 | (exp animals/ or exp animal experimentation/ or nonhuman/) not ((exp animals/ or exp animal experimentation/ or nonhuman/) and exp human/) | 7426943 |
| 22 | 20 not 21                                                                                                                                  | 2412    |

Database(s): **Cochrane Central Register of Controlled Trials** 2014 to Present

Search Strategy:

| # | Searches                                      | Results |
|---|-----------------------------------------------|---------|
| 1 | exp psoriasis/ [includes psoriatic arthritis] | 3351    |
| 2 | psorias*.mp.                                  | 8368    |

|    |                                                               |       |
|----|---------------------------------------------------------------|-------|
| 3  | psoriat*.mp.                                                  | 3216  |
| 4  | (pustul* adj4 palm*).mp.                                      | 167   |
| 5  | (pustul* adj4 plantar*).mp.                                   | 25    |
| 6  | (arthrit* adj4 mutilans).mp.                                  | 17    |
| 7  | (pustul* adj4 soles).mp.                                      | 20    |
| 8  | 1 or 2 or 3 or 4 or 5 or 6 or 7                               | 9589  |
| 9  | exp lipidomics/ or exp metabolomics/                          | 235   |
| 10 | metabolom*.mp.                                                | 1879  |
| 11 | metabolit*.mp.                                                | 14775 |
| 12 | (metabol* adj4 produc*).mp.                                   | 1585  |
| 13 | (metabol* adj4 waste*).mp.                                    | 26    |
| 14 | exp Lipids/ and (produc* or waste* or metaboliz*).mp.         | 6176  |
| 15 | lipidom*.mp.                                                  | 256   |
| 16 | ((lipid or lipids) and (produc* or waste* or metaboliz*)).mp. | 6773  |
| 17 | (fatty acid* and (produc* or waste* or metaboliz*)).mp.       | 3489  |
| 18 | (fatty acyl* and (produc* or waste* or metaboliz*)).mp.       | 2     |
| 19 | or/9-18                                                       | 27957 |
| 20 | 8 and 19                                                      | 140   |

# BIOSIS Citation Index

January 26, 2021

| Set | Results        | Save History / Create AlertOpen Saved History                                                                                                                                                  |
|-----|----------------|------------------------------------------------------------------------------------------------------------------------------------------------------------------------------------------------|
| # 3 | <b>476</b>     | #2 AND #1<br><i>Indexes=BCI Timespan=All years</i>                                                                                                                                             |
| # 2 | <b>338,667</b> | TS=(metabolom* or metabolit* or lipidom* or ((metabol* or lipid* or fatty acid* or fatty acyl*) NEAR4 (produc* or waste* or produc* or metaboliz*) ))<br><i>Indexes=BCI Timespan=All years</i> |
| # 1 | <b>44,339</b>  | TS=(psorias* or psoriat* or (pustul* NEAR4 (palm* or plantar* or mutilans or soles) ))<br><i>Indexes=BCI Timespan=All years</i>                                                                |
